# Supplementary material for: Mammographic Density and the Risk and Detection of Breast Cancer
Source: Atypon-hosted journal article supplement (doi:10.1056/nejmoa062790), 2007-01-17
Supplement: nejm_boyd_227sa1.pdf [file nejm_boyd_227sa1.pdf]

## Supplementary Appendix

This appendix has been provided by the authors to give readers additional information about their work.

Supplement to: Boyd NF, Guo H, Martin LJ, et al. Mammographic density and the risk and detection of breast cancer. *N Engl J Med* 2007;356:227-36.

**Supplementary Table 1. Risk of breast cancer according to percent**

**mammographic density, study, and method of detection: matched analysis<sup>a</sup>,**

**radiologists' classification.**

---

| <b>Cancers</b> | <b>Study</b>       | <b>No. of<br/>pairs<sup>b</sup></b> | <b>Beta</b> | <b>SE</b> | <b>OR<sup>c</sup></b> | <b>95% CI</b> | <b>P-value<sup>d</sup></b> |
|----------------|--------------------|-------------------------------------|-------------|-----------|-----------------------|---------------|----------------------------|
| All            | NBSS <sup>e</sup>  | 330                                 | 0.3464      | 0.0817    | 4.00                  | (2.1, 7.6)    | <.0001                     |
|                | OBSP <sup>f</sup>  | 385                                 | 0.3493      | 0.0890    | 4.04                  | (2.0, 8.1)    | <.0001                     |
|                | SMPBC <sup>g</sup> | 397                                 | 0.3177      | 0.0832    | 3.56                  | (1.9, 6.8)    | 0.0001                     |
|                | Combined           | 1112                                | 0.3366      | 0.0476    | 3.84                  | (2.6, 5.6)    | <.0001                     |

---

**Supplementary Table 1 - Continued**

---

|          |          |     |        |        |      |            |        |
|----------|----------|-----|--------|--------|------|------------|--------|
| Screen   | NBSS     | 219 | 0.2339 | 0.0964 | 2.55 | (1.2, 5.4) | 0.02   |
| Detected |          |     |        |        |      |            |        |
|          | OBSP     | 250 | 0.3243 | 0.1144 | 3.66 | (1.5, 9.0) | 0.005  |
|          | SMPBC    | 248 | 0.2231 | 0.1052 | 2.44 | (1.1, 5.6) | 0.03   |
|          | Combined | 717 | 0.2504 | 0.0590 | 2.72 | (1.7, 4.3) | <.0001 |

---

|                         |          |     |        |        |       |              |        |
|-------------------------|----------|-----|--------|--------|-------|--------------|--------|
| Non-Screen              | NBSS     | 57  | 0.6636 | 0.2587 | 14.22 | (1.9, 108.1) | 0.01   |
| Detected                | OBSP     | 67  | 0.8045 | 0.2798 | 24.98 | (2.8, 224.0) | 0.004  |
| <12 months <sup>h</sup> | +SMPBC   |     |        |        |       |              |        |
|                         | Combined | 124 | 0.7075 | 0.1715 | 16.95 | (4.4, 65.0)  | <.0001 |

**Supplementary Table 1 - Continued**

---

|                         |          |     |        |        |       |              |        |
|-------------------------|----------|-----|--------|--------|-------|--------------|--------|
| Non-Screen              | NBSS     | 47  | 0.6348 | 0.3167 | 12.67 | (1.1, 151.7) | 0.05   |
| Detected                | OBSP     | 115 | 0.3662 | 0.1701 | 4.33  | (1.1, 16.4)  | 0.03   |
| ≥12 months <sup>i</sup> | SMPBC    | 100 | 0.3939 | 0.1828 | 4.83  | (1.2, 20.3)  | 0.03   |
|                         | Combined | 262 | 0.4238 | 0.1055 | 5.45  | (2.4, 12.5)  | <.0001 |

---

<sup>a</sup> Adjusted for BMI, age at menarche, parity, number of live births, age at first birth, menopausal status, age at menopause, hormone replacement therapy (ever/never), and breast cancer in first degree relatives (0,1,2+). <sup>b</sup> 7 pairs from NBSS, 1 pair from OBSP and 1 pair from SMPBC are excluded from the screen or non-screen group analysis because of missing information on detection or the last mammogram date. <sup>c</sup> The odds ratio is the gradient in risk over 5 categories of mammographic density, comparing the highest(≥75%) with the lowest category(<10%). <sup>d</sup> P-value: test for  $\beta=0$ . <sup>e</sup> The Canadian National Breast Screening Study. <sup>f</sup> The Ontario Breast Screening Program. <sup>g</sup>

The Screening Mammography Program of British Columbia. <sup>h</sup> Cancers detected within 12 months of the last screening date. <sup>i</sup> Cancers detected 12 months or more after the last screening date.

**Supplementary Table 2. Risk of breast cancer according to percent mammographic density, study, and method of detection: matched analysis<sup>a</sup>, computer assisted measure.**

| Cancers | Study              | No. of pairs <sup>b</sup> | Beta   | SE     | OR <sup>c</sup> | 95% CI      | P-value <sup>d</sup> |
|---------|--------------------|---------------------------|--------|--------|-----------------|-------------|----------------------|
| All     | NBSS <sup>e</sup>  | 330                       | 0.4187 | 0.0997 | 5.34            | (2.4, 11.7) | <.0001               |
|         | OBSP <sup>f</sup>  | 386                       | 0.3538 | 0.0944 | 4.12            | (2.0, 8.6)  | 0.0002               |
|         | SMPBC <sup>g</sup> | 398                       | 0.3699 | 0.0918 | 4.39            | (2.1, 9.0)  | <.0001               |

|          |      |        |        |      |            |        |
|----------|------|--------|--------|------|------------|--------|
| Combined | 1114 | 0.3704 | 0.0540 | 4.40 | (2.9, 6.7) | <.0001 |
|----------|------|--------|--------|------|------------|--------|

---

**Supplementary Table 2 - Continued**

---

|          |          |     |        |        |      |            |        |
|----------|----------|-----|--------|--------|------|------------|--------|
| Screen   | NBSS     | 219 | 0.3223 | 0.1173 | 3.63 | (1.4, 9.1) | 0.006  |
| Detected |          |     |        |        |      |            |        |
|          | OBSP     | 251 | 0.3147 | 0.1230 | 3.52 | (1.3, 9.2) | 0.01   |
|          | SMPBC    | 248 | 0.2457 | 0.1141 | 2.67 | (1.1, 6.5) | 0.03   |
|          | Combined | 718 | 0.2753 | 0.0669 | 3.01 | (1.8, 5.1) | <.0001 |

---

|                     |          |     |        |        |        |               |        |
|---------------------|----------|-----|--------|--------|--------|---------------|--------|
| Non-Screen          | NBSS     | 57  | 1.2404 | 0.4251 | 142.82 | (5.1, 4001.3) | 0.004  |
| Detected            |          |     |        |        |        |               |        |
| <12                 | OBSP     | 67  | 0.9947 | 0.3143 | 53.45  | (4.5, 628.2)  | 0.002  |
| months <sup>h</sup> | +SMPBC   |     |        |        |        |               |        |
|                     | Combined | 124 | 0.9713 | 0.2236 | 48.68  | (8.4, 281.0)  | <.0001 |

**Supplementary Table 2 - Continued**

|                         |          |     |        |        |       |             |        |
|-------------------------|----------|-----|--------|--------|-------|-------------|--------|
| Non-Screen              | NBSS     | 47  | 0.4049 | 0.3032 | 5.05  | (0.5, 54.4) | 0.18   |
| Detected                |          |     |        |        |       |             |        |
| ≥12 months <sup>i</sup> | OBSP     | 115 | 0.3325 | 0.1703 | 3.78  | (1.0, 14.4) | 0.05   |
|                         | SMPBC    | 101 | 0.6232 | 0.2158 | 12.10 | (2.2, 65.7) | 0.004  |
|                         | Combined | 263 | 0.4560 | 0.1140 | 6.20  | (2.5, 15.1) | <.0001 |

<sup>a</sup> Adjusted for BMI, age at menarche, parity, number of live births, age at first birth,

menopausal status, age at menopause, hormone replacement therapy (ever/never), and

breast cancer in first degree relatives (0,1,2+). <sup>b</sup> 7 pairs from NBSS, 1 pair from OBSP

and 1 pair from SMPBC are excluded from the screen or non-screen group analysis

because of missing information on detection or the last mammogram date. <sup>c</sup> The odds

ratio is the gradient in risk over 5 categories of mammographic density, comparing the

highest(≥75%) with the lowest category(<10%). <sup>d</sup> P-value: test for  $\beta=0$ . <sup>e</sup> The

Canadian National Breast Screening Study. <sup>f</sup> The Ontario Breast Screening Program. <sup>g</sup>

The Screening Mammography Program of British Columbia. <sup>h</sup> Cancers detected within

12 months of the last screening date. <sup>i</sup> Cancers detected 12 months or more after the last

screening date.
